# Supplementary material for: Genetic analysis of ALS cases in the isolated island population of Malta
Source: PubMed Central journal article supplement (PMC8115635; doi:10.1038/s41431-020-00767-9), 2021-01-07
Supplement: 41431_2020_767_MOESM1_ESM.pdf [file 41431_2020_767_MOESM1_ESM.pdf]

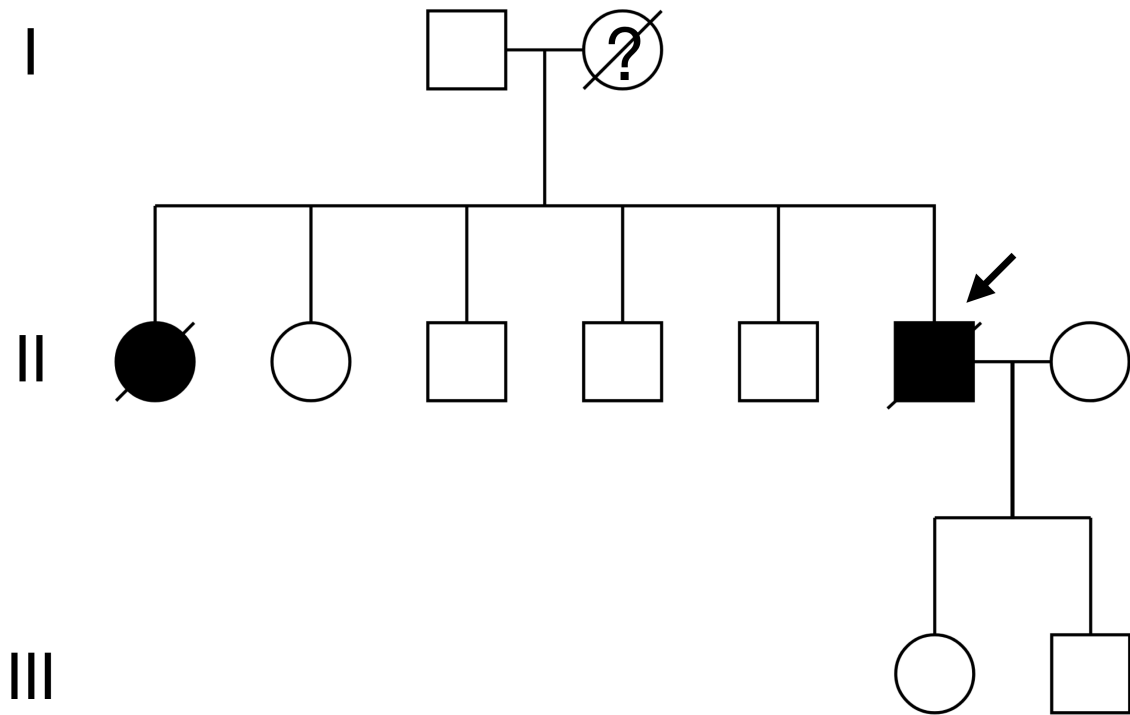

**Figure S1.** Pedigree chart of a fALS case with ALS-associated expanded *ATXN2* repeats. Filled symbols indicate affected individuals. The arrow indicates the proband.

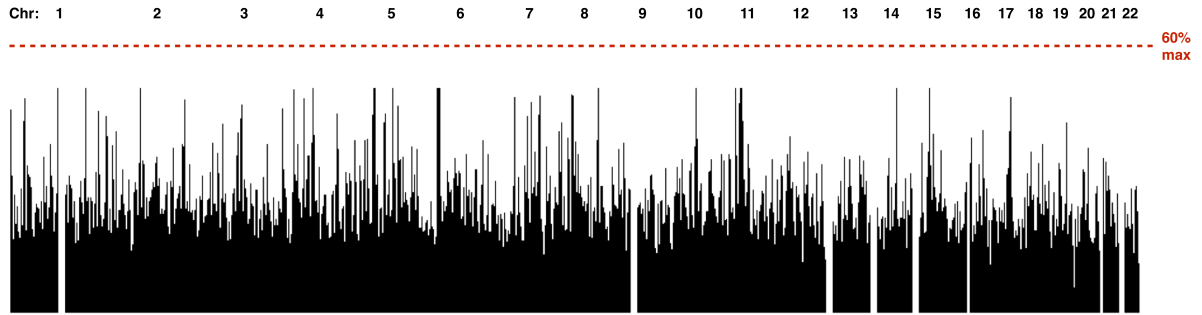

**Figure S2.** Homozygosity mapping of Maltese sALS patients. Mapping with allowed genetic heterogeneity did not reveal any genomic intervals that satisfied accepted criteria for a significant excess of homozygosity (HomozygosityMapper score  $>80\%$  of max value). Chromosome numbers are indicated on top.

| Gene          | cDNA change                | Protein change          | dbSNP <sup>141</sup> ID | Prediction            |                       | European gnomAD MAF  | Project MinE Allele Frequency |          | No. of patients | ALS type      | No. of controls |
|---------------|----------------------------|-------------------------|-------------------------|-----------------------|-----------------------|----------------------|-------------------------------|----------|-----------------|---------------|-----------------|
|               |                            |                         |                         | MetaSVM               | MetaLR                |                      | ALS cases                     | Controls |                 |               |                 |
| <i>ATXN2</i>  | NM_002973.3:c.743G>A       | p.(Ser248Asn)           | rs7969300               | Tolerated             | Tolerated             | 0.0031               | 0.006239                      | 0.005057 | 0               | NA            | 2               |
| <i>ATXN2</i>  | NM_002973.3:c.1507G>C      | p.(Val503Leu)           | rs771843383             | Tolerated             | Tolerated             | 0.00002              | NA                            | NA       | 0               | NA            | 1               |
| <i>CCNF</i>   | NM_001761.2:c.2122G>C      | p.(Ala708Pro)           | rs754766175             | Tolerated             | Tolerated             | NA                   | NA                            | NA       | 0               | NA            | 1               |
| <i>CCNF</i>   | NM_001761.2:c.1188G>T      | p.(Glu396Asp)           | rs36008785              | Tolerated             | Tolerated             | 0.0001               | 0.000827                      | 0.000202 | 0               | NA            | 1               |
| <i>CYLD</i>   | NM_015247.2:c.665C>A       | p.(Thr222Lys)           | rs587778225             | Tolerated             | Tolerated             | 0.00011              | NA                            | NA       | 0               | NA            | 2               |
| <i>ERBB4</i>  | NM_005235.2:c.3859G>A      | p.(Glu1287Lys)          | rs367568427             | Damaging              | Damaging              | 0.00003              | NA                            | NA       | 0               | NA            | 1               |
| <i>FIG4</i>   | NM_014845.5:c.434C>T       | p.(Pro145Leu)           | NA                      | Tolerated             | Tolerated             | NA                   | NA                            | NA       | 0               | NA            | 1               |
| <i>GLE1</i>   | NM_001003722.1:c.5C>G      | p.(Pro2Arg)             | rs150246404             | Tolerated             | Tolerated             | 0.0008               | 0.000752                      | 0.000607 | 0               | NA            | 1               |
| <i>KIF5A</i>  | NM_004984.2:c.2927C>T      | p.(Thr976Ile)           | rs139801016             | Tolerated             | Tolerated             | 0.0001               | 0.000301                      | 0.000202 | 1               | fALS          | 1               |
| <i>NEFH</i>   | NM_021076.3:c.1684C>G      | p.(Pro562Ala)           | rs530872313             | Tolerated             | Tolerated             | 0.00001              | 0.000230                      | 0.000205 | 0               | NA            | 1               |
| <i>NEK1</i>   | NM_001199397.1:c.1535C>T   | p.(Ala512Val)           | rs771824152             | Tolerated             | Tolerated             | 0.00006              | NA                            | NA       | 0               | NA            | 1               |
| <i>SETX</i>   | NM_015046.5:c.3047T>C      | p.(Ile1016Thr)          | rs200856903             | Damaging              | Damaging              | 0.00001              | NA                            | NA       | 1               | sALS          | 1               |
| <i>SPG11</i>  | NM_025137.3:c.820G>A       | p.(Val274Ile)           | rs543316224             | Tolerated             | Tolerated             | 0.00001              | NA                            | NA       | 0               | NA            | 1               |
| <i>SS18L1</i> | NM_198935.2:c.961G>A       | p.(Ala321Thr)           | rs36106901              | Tolerated             | Tolerated             | 0.00042              | 0.001353                      | 0.000607 | 2               | sALS          | 2               |
| <i>TIA1</i>   | NM_022173.2:c.1070A>G      | p.(Asn357Ser)           | rs116621885             | Tolerated             | Tolerated             | 0.0125               | 0.009847                      | 0.005461 | 0               | NA            | 1               |
| <i>TNIP1</i>  | NM_001252390.1:c.1748C>T   | p.(Pro583Leu)           | rs888695021             | Tolerated             | Tolerated             | 0.00001 <sup>a</sup> | NA                            | NA       | 0               | NA            | 1               |
| <i>TNIP1</i>  | NM_001252390.1:c.1049C>T   | p.(Thr350Ile)           | rs369725837             | Tolerated             | Tolerated             | 0.00002              | 0                             | 0.000405 | 0               | NA            | 1               |
| <i>UNC13A</i> | NM_001080421.2:c.4197+7C>T | p.?<br>(splice variant) | rs148883310             | Damaging <sup>b</sup> | Damaging <sup>b</sup> | 0.0194               | 0.024357                      | 0.028340 | 2               | sALS,<br>fALS | 1               |

**Abbreviations:** dbSNP = Single Nucleotide Polymorphism database; gnomAD = Genome Aggregation Database; MAF = minor allele frequency; NA = not available

<sup>a</sup> Data from Trans-Omics for Precision Medicine (TopMed) Program

<sup>b</sup> Splice variants were automatically considered deleterious

**Table S1.** Rare nonsynonymous single nucleotide and splice-site variants found in controls or in ALS patients as well as controls.
